1 **Social and nutritional factors shape larval aggregation, foraging, and body mass in a**  
2 **polyphagous fly**

3 Authors: Juliano Morimoto<sup>1,2,\*</sup>, Binh Nguyen<sup>1</sup>, Shabnam Tarahi Tabrizi<sup>1</sup>, Fleur Ponton<sup>1</sup>,  
4 Phillip W. Taylor<sup>1</sup>

5

6 1 - Department of Biological Sciences, Macquarie University, NSW 2109, Australia

7 2 - Programa de Pós-Graduação em Ecologia e Conservação, Federal University of Paraná,  
8 Curitiba, Brazil, 19031, CEP: 81531-990

9 \* To whom correspondence should be addressed.

10 E-mail: [juliano.morimoto@mq.edu.au](mailto:juliano.morimoto@mq.edu.au)

11

12 **Data accessibility**

13 Data will be made available in Dryad upon the acceptance of the manuscript.

14 **Keywords:** Development, Larval ecology, Feeding

15

16

17

18 **Abstract**

19 The majority of insect species have a clearly defined larval stage during development. Larval  
20 nutrition is crucial for individuals' growth and development, and larval foraging success  
21 often depends on both resource availability and competition for those resources. To date,  
22 however, little is known about how these factors interact to shape larval development and  
23 behaviour. Here we manipulated the density of larvae of the polyphagous fruit fly pest  
24 *Bactrocera tryoni* ('Queensland fruit fly'), and the diet concentration of patches in a foraging  
25 arena to address this gap. Using advanced statistical methods of machine learning and linear  
26 regression models, we showed that high larval density results in increased larval aggregation  
27 across all diets except in extreme diet dilutions. Larval aggregation was positively associated  
28 with larval body mass across all diet concentrations except in extreme diet dilutions where  
29 this relationship was reversed. Larvae in low-density arenas also tended to aggregate while  
30 those in high-density arenas tended to disperse, an effect that was observed for all diet  
31 concentrations. Furthermore, larvae in high-density arenas displayed significant avoidance of  
32 low concentration diets – a behaviour that was not observed amongst larvae in low-density  
33 arenas. Thus, aggregation can help, rather than hinder, larval growth in high-density  
34 environments, and larvae may be better able to explore available nutrition when at high-  
35 density than when at low density.

36

37

38

## 39 **Introduction**

40 In holometabolous insects, larval foraging behaviour largely determines individual fitness  
41 (Chapman, 1998). Poor developmental conditions marked by low resource availability – such  
42 as when food is scarce and there is high larval competition – often affects both larval  
43 developmental time and body size in adulthood [e.g. <sup>1-10</sup>]. Adult body size tends to correlate  
44 positively with female fecundity as well as male mating performance and reproductive  
45 success <sup>5,11</sup>; accordingly, larval foraging behaviour is under productivity selection in females  
46 and sexual selection in males <sup>11-15</sup>, with profound effects on behavioural and evolutionary  
47 processes such as cognitive task performance, survival, reproduction, and ultimately sexual  
48 selection and sexual conflict <sup>6,16-18</sup>.

49

50 The quantity of resources in a food patch and the number of competing foragers are important  
51 determinants of larval responses to developmental conditions <sup>19</sup>. To maximize resource  
52 acquisition for investment in fitness traits of adulthood <sup>20,21</sup>, larvae are expected to avoid  
53 competition with conspecifics, and to prefer patches of highest resource availability. The  
54 rationale for this is simple; if the resources are poor or the number of individuals sharing a  
55 finite resource is high, the benefits of foraging on that patch may be outweighed by the  
56 potential benefits of leaving that patch to seek resources elsewhere. Thus, the ideal situation  
57 may be that in which larvae forage in resource-rich food patches without competition.

58 Research across insect taxa has shown that insect larvae have well-defined optimum diets that  
59 sustain development and growth, and produce high quality adults <sup>22-27</sup>, that an excess of  
60 nutrients can be detrimental and even compensated for when larvae have a choice to select  
61 their food [e.g. <sup>28-31</sup>]. For social interactions, however, the rule is far less intuitive. Larval  
62 aggregations are common in many insects <sup>32,33</sup>. Although such social interactions may  
63 increase foraging competition, larval aggregations can confer physiological and behavioural

64 benefits that sustain larval growth and development<sup>34-45</sup>. As a result, larvae may maximize  
65 development in a high-quality diet with some degree of social interactions and aggregation,  
66 provided that competition is not so high that the benefits of aggregation are negated. For  
67 instance, *Drosophila* larvae can benefit from occupying patches that are shared with  
68 conspecifics, although the increase in competition can in some cases offset the benefits of  
69 social behaviour<sup>45</sup> [see also<sup>46-48</sup>]. This hypothesis is derived from the premise that social and  
70 nutritional factors interact to shape larval behaviour and growth during development. To date,  
71 however, there have been very few direct empirical tests of this hypothesis.

72

73 An early attempt to demonstrate interactions between nutritional and social factors as  
74 determinants of larval development showed that, in the gregarious caterpillar *Hemileuca*  
75 *lucina*, social environment interacts with the quality of the food source to determine larval  
76 growth at mild temperatures<sup>37</sup>. This investigation only contrasted caterpillars in solitary and  
77 groups of a fixed size (10 individuals), and only investigated development on two related-  
78 food sources, young vs. mature leaves of *Spiraea latifolia*. Although providing a useful  
79 demonstration of concept, this dichotomous approach – i.e. solitary vs groups, young vs  
80 mature leaves – has limited scope for understanding the interaction between social and  
81 nutritional factors driving the ecology of larval development. Other studies have shown the  
82 importance of larval aggregation in feeding and growth rates, insect-plant interactions, larval  
83 defence against predators, and larval thermoregulation [e.g.<sup>34-44</sup>]. However, there has been no  
84 detailed investigation of how the social and nutritional environments of larvae interact to  
85 shape development and performance. Key questions remain unanswered though, as to ‘how  
86 does the number of foraging larvae with access to a common resource pool, which increase  
87 the potential for social interactions, influence larval aggregation?’; ‘When resource  
88 availability decreases, do larvae aggregate to the same extent as to when resources are

89 abundant?'; and 'What are the implications of density- and diet-dependent larval aggregation  
90 to larval growth and foraging behaviour?'

91

92 In the present study, we addressed these key questions of the interaction between nutritional  
93 and social factors driving larval foraging decisions and performance in the tephritid fruit fly

94 *Bactrocera tryoni* (aka 'Queensland fruit fly' or 'Qfly'). Some tephritids are highly

95 polyphagous and are amongst the most damaging insect pests of horticulture globally <sup>49-51</sup>.

96 *Bactrocera tryoni* is able to infest more than 150 different fruits <sup>49,52</sup>; the wide diversity of

97 fruit that are exploited by *B. tryoni*, and variability of nutrients available in infested fruit,

98 make this species well suited for investigation of larval nutritional ecology. Here we first

99 designed circular foraging arenas containing patches of varying macronutrient concentration,

100 where different densities of larvae were allowed to forage. Larvae foraged freely in choice

101 and no-choice arenas, which allowed us to investigate the diet- and density-dependent effects

102 of larval developmental environment on foraging behaviour and larvae body mass. Using

103 statistical methods of machine learning and linear regression, we tested whether tendency to

104 aggregate and size of aggregations depended on the larval density and diet, by allowing

105 groups of several larval densities to forage in arenas of varying diet concentration within

106 which each arena contained multiple patches of the same diet. We then tested how larval

107 density and aggregation affected larval body mass across different diets. Finally, we

108 investigated how larval density influenced larval foraging decisions when facing choices

109 amongst patches with varying resource availability.

110

## 111 **Predictions**

112 1) Previous studies in other species have shown that larvae prefer to occupy patches that

113 are shared with conspecifics [e.g., <sup>45</sup>]. Thus, we predicted that an increase in larval

114 density should increase aggregation formation as well as aggregation size amongst  
115 diet patches. However, this effect could be diet-dependent, whereby macronutrient-  
116 poor diets could support smaller aggregations whereas macronutrient-rich diets would  
117 support larger aggregations. As a result, we predicted that aggregates should be  
118 smaller in macronutrient-poor diets than in macronutrient-rich diets;

119 2) In other insects, larval aggregation can facilitate feeding [e.g., <sup>40</sup>]. We therefore  
120 predicted that treatments with high larval aggregations should have larvae with higher  
121 body mass. However, macronutrient-poor diet is known to reduce larval body mass  
122 (see ‘Introduction’). As a result, we predicted that larval body mass should be lower  
123 in macronutrient-poor diets compared with macronutrient-rich diets;

124

## 125 **Materials and Methods**

### 126 *Fly stock and egg collection*

127 We collected eggs from a laboratory-adapted stock of *B. tryoni* (>17 generations-old). The  
128 colony has been maintained in non-overlapping generations in a controlled environment room  
129 (humidity  $65 \pm 5\%$ , temperature  $25 \pm 0.5^\circ\text{C}$ ) with light cycle of 12h light: 0.5h dusk:11h  
130 dark: 0.5h dawn). Adults were provided a free-choice diet of hydrolysed yeast (MP  
131 Biomedicals, Cat. n° 02103304) and commercial refined sucrose (CSR® White Sugar), while  
132 larvae were maintained using the Chang-2006 gel-based diet formulation of Moadeli, et al. <sup>53</sup>  
133 for the last 7 generations (previously maintained on a carrot-based diet). We collected the  
134 eggs in a 300mL semi-transparent white plastic bottle that had numerous perforations of  
135 <1mm diameter through which females could insert their ovipositor and deposit eggs. The  
136 bottle contained 20mL of water, to maintain high humidity. Eggs were collected for 2h, and  
137 were then transferred to larval diet with a soft brush, where eggs were allowed to hatch and  
138 larvae to develop until they reached 2<sup>nd</sup> instars.

139

### 140 *Experimental diets and foraging arena*

141 We used 5 experimental diets that varied in macronutrient (i.e., yeast for protein and sugar  
142 for carbohydrate) concentration: our control and reference 100% Chang-2006 gel-based diet,  
143 which has proven effective for the larvae of this species<sup>53</sup>, followed by diets with 80%, 60%,  
144 40%, and 20% macronutrient concentration relative to the control diet (see Supplementary  
145 Tables for recipes). 20mL of diet was poured into 90mm diameter Petri dishes and allowed to  
146 set. We also prepared an agar solution that contained the same components as the gel diets  
147 except that no yeast or sugar was included. 20mL of the agar solution was used to cover  
148 90mm diameter Petri dishes that then served as "foraging arenas". After setting, five equally  
149 spaced holes were made in the agar base of each foraging arena by perforating it with a  
150 25mm diameter plastic tube. The same tube was used to cut discs from the experimental  
151 diets. The discs of experimental diets were then deposited – in order or randomly – in the  
152 holes that had been cut in the agar base of the foraging arenas (see Fig S1). Because the agar  
153 solution did not contain macronutrients, we considered the remaining areas of agar base as  
154 ‘no choice’ foraging option. Thus, larvae had a total of 6 options (i.e., 5 experimental diets +  
155 agar base). The pH of all experimental diets and the agar base was adjusted to 3.8-4 with  
156 citric acid. For the experiment, hydrolyzed yeast and sucrose were obtained from MP  
157 Biomedicals (Cat. n° 02103304 and 02902978, respectively), Brewer’s yeast was obtained  
158 from Lallemand (Cat n° LBI2250), Nipagin was obtained from Southern Biological (Cat n°  
159 MC11.2), and all other chemicals composing the diet (e.g., citric acid [see<sup>53</sup>]) were obtained  
160 from Sigma Aldrich®.

161

### 162 *Experimental procedures and statistical analyses*

163 For all experiments, we placed 2<sup>nd</sup> instar larvae at the centre of the foraging arena (see Fig  
164 S1) that was then covered with the lid to minimize the loss of moisture. To minimize  
165 potential for effects of visual cues on larval diet choices, the foraging arenas were placed in a  
166 dark room. Foraging arenas were set up at 4 larval densities: 10, 25, 50, and 100 larvae. All  
167 larvae were released in the arena simultaneously. We did not observe cannibalism or escapes  
168 (larval counts were the same at the beginning and at the end of the experiments). All  
169 statistical analyses were performed using R version 3.4.0 and plots were performed using the  
170 package ‘ggplot2’<sup>54,55</sup>.

171

### 172 *Experiment 1: Larval aggregation*

173 To test effects of density and diet on larval aggregation and growth, for all diets and across  
174 all larval densities, we set up foraging arenas that contained 5 food patches of the same diet  
175 concentration (e.g., all patches with 100% diets) (see Fig S1). We then numbered the patches,  
176 and assessed the number of larvae in each of the diet patches as well as on the agar base at  
177 1h, 2h, 4h, 6h, 8h, and 24h after larvae were placed in the arena. We observed that larvae  
178 could move across the diameter of the foraging arena in less than 1min, meaning that the time  
179 points used in the experiment were ample to allow larvae to explore the entire foraging arena.  
180 Four replicates were set up per larval density per diet ( $N = 80$  foraging arenas). After 24h, 3  
181 larvae per diet per larval density per replicate were selected from each foraging arena and  
182 weighed on a ME5 Sartorius® scale (0.001g precision) to obtain an estimate of average larval  
183 body mass. We tested the effects of larval density, diets, and their interaction, using two-way  
184 ANOVA model that included replicate as a covariate. To measure larval aggregation, we  
185 calculated an ‘aggregation index’ ( $AI$ ) which was the sum of the absolute residuals of our  
186 observed data against the machine learning random predictions of a density-dependent  
187 random distribution; the procedure to obtain  $AI$  was as following:



188

- 189 1. We simulated the choices of larvae in foraging arenas with density 10, 25, 50, 100,  
190 and 200 larvae choosing amongst 6 patches, where the larvae were equally likely to  
191 display choice for any of the options (i.e., the choices for each patch were displayed  
192 with equal probability  $p_n = 1/6$ , where  $p_n$  is the probability of a larvae choosing a  
193 given patch). We extrapolated our simulation for larval densities of 10, 25, 50, 100,  
194 and 200 larvae in order to build a robust function of density-dependent aggregation  
195 (see Fig S2).
- 196 2. We then obtained the residual distribution of our empirical data and the simulated  
197 density-dependent model against the exact random distribution, calculated simply by  
198 dividing the larval density by the number of patch options (i.e.  $\delta/6$ , where  $\delta$  = larval  
199 density); We then fitted a random forest machine learning regression using the  
200 package ‘randomForest’<sup>56</sup> to obtain a model that predicted the behaviour of the  
201 residuals. The random forest regression was cross-validated using the package  
202 ‘rfUtilities’<sup>57</sup> (Fitted Mean Square Error of the model: 0.009; Median Cross-  
203 validation RMSE: 0.036); To build the model, 80% of the simulated data was used in  
204 the training phase while 20% was used in the test phase. The model performed  
205 accurately during the test phase (Mean Square Error in the Test dataset: 0.038);
- 206 3. Next, we used the machine learning model to predict the expected distribution of  
207 residuals in our dataset using the ‘predict’ function, and calculated the aggregation  
208 index (*AI*) as the difference between the observed sum of residuals and the predicted  
209 sum of the residuals obtained with the machine learning regression algorithm.

210

211 The machine learning model provides more accurate predictions of the expected distribution

212 of the residuals than conventional linear model. For instance, the MSE (mean square error) of

213 the machine learning model in the test data set was 0.00404 whereas the MSE estimated  
214 using conventional linear model was 0.0107, suggesting that the machine learning model was  
215 ~2.7 times more accurate in its prediction. We therefore opted to use the machine learning  
216 approach to account for non-linear behaviour of the residuals as the density of larvae in the  
217 foraging arenas increases (see Fig S2). When we modelled *AI* using general linear model  
218 followed by a two-way ANOVA to determine the effect of time, larval density, diet, and their  
219 two-way interactions, we transformed *AI* (i. e.  $AI^{2.25}$ ) in order to stabilize the variance  
220 across larval densities (Levene's test:  $F_{3,476} = 0.560$ ,  $p = 0.641$ ) and diets (Levene's test:  $F_{4,475}$   
221  $= 0.548$ ,  $p = 0.700$ ). To test for the effects of aggregation on larval body mass, we used an  
222 ANOVA with the average aggregation index over time, larval density, and diet, as well as the  
223 two-way interactions between these factors. For statistical inference, we transformed larval  
224 body mass (i.e.,  $Larval\ mass^{0.3}$ ) for homogeneity of variances across larval densities  
225 (Levene's test:  $F_{3,76} = 0.591$ ,  $p = 0.622$ ). To calculate the average size of the largest  
226 aggregation, we sampled the aggregation with the highest larval count, and calculated the  
227 proportion of individuals of the group that were found in that aggregation ( $\rho$ ) as  $\rho = \alpha/\delta$ ,  
228 where  $\alpha$  = the number of larvae in the largest patch and  $\delta$  = the larval density of the group.  
229 To test for the effects of time, larval density, diet, and their two-way interactions we used a  
230 generalized linear model (GLM) with *Binomial* distribution – as we were dealing with  
231 proportion data – and *quasi* extension, to account for overdispersion of the data. Plots are of  
232 the raw data.

233

### 234 *Experiment 2: Larval foraging*

235 For larval foraging assays, the foraging arena contained one patch of each experimental diet,  
236 and we assessed the number of larvae selecting each diet across all larval densities (see  
237 above) at 1h, 2h, 4h, 6h, and 8h after larvae were placed in the arena. Foraging arenas

238 contained food patches (i.e. 100%, 80%, 60%, 40% and 20% macronutrient concentration) in  
239 different orders within the arena (see Fig S1); we controlled for the order of the patches in all  
240 models, which had no effect in the results (see ESM). We fitted a multinomial logistic  
241 regression model using the ‘multinom’ function of the “nnet” package<sup>58</sup>. To test for foraging  
242 propensity, we controlled for the order of the food patches while investigating the main  
243 effects of time, larval density, and their interaction. Agar base (no choice) was the reference  
244 level. To test for dietary choices, we used the same multinomial logistic regression, but this  
245 time only considering those larvae that chose to forage. By using the standard diet (100%  
246 macronutrient concentration) as our reference level, we could then infer the relative dietary  
247 preferences of larvae that foraged. Statistical inferences for multinomial logistic regressions  
248 were made based on 95% and 99% confidence intervals for each larval density separately.

249

## 250 **Results**

### 251 *Experiment 1: High larval density increases larval body mass*

252 We first tested the influence of larval density on growth. Our results showed highly  
253 significant positive effects of diet concentration and larval density on body mass (Table S1),  
254 although there was no significant interaction between these factors. Body mass increased  
255 steadily with larval density in the foraging arena and consistently across all diets (Fig 1).  
256 However, diet concentration also affected larval body mass, as larvae from foraging arenas  
257 with diluted diets (i.e. 40% and 20% macronutrient concentration) had lower body mass than  
258 larvae from arenas containing more concentrated diets (Fig 1).

259

### 260 *Experiment 1: Larval density affects larval aggregation in a diet-dependent manner*

261 We investigated whether larval density modulated larval aggregation, and whether this  
262 relationship was affected by diet concentration. We found significant interaction between

263 effects of diet concentration and larval density on the aggregation index (Table S2), whereby  
264 larvae in high-density arenas aggregated more in high macronutrient concentration diets  
265 (>40%) and less in low macronutrient concentration diets (20%, Fig 2a-b).

266

267 There was a significant interaction between time and larval density, whereby larvae in low-  
268 density arenas (10 larvae) increased aggregation as time foraging passed, while the opposite  
269 pattern was observed for high-density arenas (100 larvae) (Table S2, Fig 2a-b). This was  
270 particularly evident for low-density arenas with low macronutrient concentration diets (see  
271 Fig 2a). This is important because if the larvae were simply coalescing in the same location  
272 (i.e., not seeking to aggregate but converging to the same location with high quality food  
273 substrate), we would expect larvae in low-density arenas to show the same pattern for high-  
274 and low diet concentration. Instead, the results show the opposite is true, whereby larvae in  
275 low-density arenas tended to aggregate more over time with low diet concentration than with  
276 high diet concentration (Fig 2a). This provides evidence that larvae seek to aggregate,  
277 especially when foraging in low-density arena and with low-resource food substrates. Arenas  
278 with density of 25 and 50 larvae showed the same trend as arenas with 10 and 100 larvae,  
279 respectively, although with lower magnitude (Fig 2a-b).

280

281 ***Experiment 1: The relationship between larval aggregation and larval body mass is diet-***  
282 ***dependent***

283 Next, we tested the relationship between larval aggregation and body mass. We found that  
284 aggregation had an overall highly significant positive effect on larval body mass when diet  
285 concentration was 40% or greater but that a negative trend was instead observed when diet  
286 concentration was 20% (Fig 2c, Table S3). There was a significant effect of diet  
287 concentration and larval density, but there were no significant interactions between larval

288 density and diet concentration, larval density and aggregation index, nor between diet  
289 concentration and aggregation index (Table S3). These results provide evidence for a positive  
290 relationship between larval aggregation and larval body mass, and revealed that in some  
291 cases nutrient concentration in the diet can be a strong modulator of this relationship.

292

### 293 ***Experiment 1: Larval density and diet influence the size of larval aggregations***

294 Previous studies have shown that larval aggregation can help larvae to feed more efficiently,  
295 potentially leading to an increase in larval body mass (see for instance <sup>40,59</sup>). If this is true, an  
296 aggregation could become a ‘hotspot’ for other larvae, and we would expect that arenas with  
297 high larval densities would have few large aggregations. This could explain the relationships  
298 between larval aggregation and body mass and also the relationship between larval density  
299 and larval aggregation. Alternatively, high larval density could make larvae more inclined to  
300 disperse in order to minimize competition and, as a result, form smaller aggregations at more  
301 locations, hence exploiting a greater number of food patches. Our results showed a significant  
302 interaction between the effects of larval density and time, and larval density and diet  
303 concentration on the proportion of individuals in the largest aggregation (see Table S4, Fig  
304 3). These results demonstrate that i) arenas containing diluted diets (i.e., 20% and 40%) had  
305 relatively more larvae in the largest aggregations than did arenas containing more  
306 concentrated diets, ii) low larval density arenas (i.e., 10 larvae) had aggregations that  
307 contained relatively more larvae compared with higher density arenas (i.e., 25, 50, 100), iii)  
308 high density arenas (i.e., 100 larvae) were more evenly distributed compared with low  
309 density arenas, whereas the opposite effect was found for low density arenas (i.e., 10 larvae),  
310 and iv) the proportion of larvae in the most numerous aggregation decreased in diluted diets  
311 in high density arenas, an effect that was not observed for low-density arenas (see Fig 3).

312 These findings support the hypothesis that high larval density promotes larval movement,  
313 whereby larvae formed smaller aggregations that exploit patches more evenly.

314

### 315 *Experiment 2: Larval density shapes larval foraging behaviour*

316 Next, we measured how larval density influenced larvae foraging propensity, as well as  
317 larvae foraging decisions when larvae have a choice amongst patches with varying diet  
318 concentrations. By using a multinomial logistic regression model that used ‘no choice’ (i.e.  
319 agar base) as our reference level, we could assess larval foraging propensity over time. Our  
320 results showed that larvae were more likely to forage in any given patch than to not forage at  
321 all, and the propensity of foraging was particularly high for patches of high nutrient  
322 concentration independent of larval density (Fig 4a, Table S5, Fig S3). Interestingly, the  
323 range of diets in which larvae foraged was greater for arenas containing 50 and 100 larvae  
324 and included the patch with 40% diet in addition to the 100%, 80% 60% patches that were  
325 more dominant for arenas of lower larval density (Fig 4a). These findings show that larvae  
326 are generally more prone to forage in high-quality patches, and that larval foraging  
327 propensity is density-independent.

328

329 We then tested whether larval density affected larval diet choices, using again a multinomial  
330 logistic regression although this time we used the standard diet (i.e. 100%) as our reference  
331 diet and excluded non-foraging larvae, while modelling the behaviour of larvae that were  
332 actively foraging in one of the food patches in the previous experiment. In arenas with low  
333 larval density (10 larvae), larvae displayed a significant preference for diets with 60%  
334 macronutrient concentration relative to the standard (100%) diet (Fig 4b, Table S6).  
335 However, as larval density increased (25 and 50 larvae), there was a shift in preference  
336 toward the patch containing 80% macronutrient concentration (Fig 4b), and finally, when

337 larval density was the highest (100 larvae), larvae displayed statistically significant  
338 preferences for both 60% and 80% macronutrient patches compared to the standard diet (Fig  
339 4b-e). More importantly, though, is that only larvae in arenas with high density (50 and 100  
340 larvae) displayed significant avoidance of low concentration patches of 20% macronutrient  
341 concentration (Fig 4d-e).

342

### 343 **Discussion**

344 In this study, we demonstrate how key ecological factors interact to determine larval foraging  
345 behaviour and growth in *B. tryoni*. Our findings showed that larval aggregation increased  
346 with larval density in a diet-dependent manner, and promoted larval body mass across all  
347 diets. Importantly, larval density modulated the size of larval aggregations, and influenced  
348 larval foraging behaviour when larvae experienced patches with varying concentrations,  
349 highlighting a role of social interactions and population density for larval behaviour. Our  
350 findings provide insight into larval foraging decisions of fruit flies, and more generally,  
351 provide insight into broad ecological patterns arising from nutrition and intraspecific  
352 competition within groups and populations. Fruit fly larvae are commonly found in  
353 aggregations within a fruit<sup>9,10,60</sup>. Furthermore, fruits can be heterogeneous foraging  
354 environments for larvae [e.g.,<sup>61</sup>], and the nutritional composition of fruit can change as  
355 larvae develop [see<sup>62-64</sup>]. Therefore, the density of larvae and local diet quality might  
356 determine larval movement within a fruit in search of more nutritious and less competitive  
357 foraging sites. It is important to note that it is unlikely that our findings apply to movement of  
358 larvae between fruits. Crawling out of fruits is dangerous owing to risks of predation [<sup>65</sup>,  
359 reviewed by<sup>66</sup>] and desiccation. In nature, *B. tryoni* females modulate their oviposition  
360 behaviour to minimize intra-specific competition amongst larvae<sup>67</sup>, and it is reasonable to  
361 expect the larvae to very rarely move between fruits.

362

363 High population density can force animals to change their behaviour and expand their niche  
364 due to inter- and intra-specific competition, and this is a well-established ecological principle  
365 observed in both the laboratory and in nature <sup>68,69</sup>. Even though larvae are prone to aggregate,  
366 an increase in larval density could increase larval competition within large aggregations,  
367 which could in turn drive larvae to disperse and form smaller aggregations across different  
368 locations. The smaller aggregation size observed in high-density arenas support this idea,  
369 meaning that larval aggregations formed in high-density arenas were proportionally smaller  
370 than those formed at lower densities. Moreover, larval aggregations were proportionally  
371 smaller as the density increased and the larvae spent more time foraging, suggesting that  
372 social interactions within larger aggregations are likely to induce more frequent movement by  
373 the larvae. As the larvae move more often, they are more likely to find new (and unexplored)  
374 food patches, and are therefore more likely to explore patches more evenly. The influence of  
375 larval density on larval aggregation and growth could therefore be a plastic response to  
376 intraspecific competition because it could lead to better larval foraging decisions and a  
377 broader niche exploration <sup>45,70</sup>. The findings that high larval density also influence larval  
378 foraging behaviour in ways that decrease larval foraging propensity on resource-poor diet  
379 patches provide further support for the idea that high larval density promotes exploration of  
380 the foraging environment and effective exploitation of nutritional resources. Individuals of  
381 many species use social cues when making decisions <sup>71</sup>, and recent models have predicted  
382 that social interactions could improve individual foraging success, especially when food is  
383 scarce and distributed heterogeneously <sup>72</sup>. It is also possible that larval aggregation alters the  
384 nutritional composition and the microbial communities of the diets. For instance, larvae of  
385 some insect species can be cannibalistic <sup>73,74</sup>, and because larvae are a rich source of  
386 nutrients, cannibalism could affect the nutrient status of a food patch. Moreover, in *D.*



387 *melanogaster*, larval foraging behaviour is determined by the bacterial communities in the  
388 diet <sup>75</sup>, and in *B. tryoni*, gut-microbial fungi in the diet have been found to promote larval  
389 development under nutrient-limiting conditions <sup>76</sup>. If larval density affected the relative  
390 abundance of these fungi in the diet, this could in turn have influenced larval foraging  
391 behaviour and larval body mass. Future studies that investigate the impact of larval density  
392 on the occurrence of cannibalism, and that compare changes in larval and diet microbial  
393 profiles in high- and low-density social environments will provide insights into the  
394 mechanisms underpinning the effects of larval environments on foraging behaviour and  
395 growth.

396

397 A negative relationship between population density and individual fitness is often assumed in  
398 ecology [reviewed by <sup>77</sup>]. In invertebrates, including tephritid fruit flies, high-densities at the  
399 larval stage can decrease nutrient availability, and reduce adult body mass, reproductive  
400 success, and survival [e.g. <sup>1,3-9,60</sup>], which can lead to a density-dependent effects on fitness  
401 that extends through generations <sup>6</sup>. However, high densities can also mitigate the negative  
402 effects of environmental stresses, and act as a buffering factor for individual fitness and  
403 survival [reviewed by <sup>77</sup>]. Therefore, high-density environments can sometimes confer fitness  
404 benefits. Our findings support this view, as they reveal that the density of larvae can trigger  
405 behavioural responses early in life that can benefit larval growth. This positive effect is likely  
406 due to an increase in exploratory behaviour when at high-densities, which can increase niche  
407 exploration and nutrient acquisition. It is important to mention that competition amongst  
408 conspecifics should determine threshold in which sociality provides benefits to the larvae,  
409 after which further increase in density should incur costs that offset the benefits to  
410 individuals' fitness <sup>45</sup>. This threshold is currently unknown, but we predict that further  
411 increase in the density of larvae in our experiments (e.g., 400 larvae) should result in

412 measurable costs such as decrease in body mass of the larvae. Determining the threshold is  
413 out of the scope of this study, but remains an important topic for future investigations.

414 Nonetheless, our findings are applicable to biological scenarios where intraspecific  
415 competition increases and resources are heterogeneous, and thus represent a logical  
416 consequence of the interaction between the nutritional and social environments.

417

418 It is important to mention that as density increases, larvae may be displaced from the patch  
419 due to the competition with conspecifics for space. This is a natural consequence of high  
420 larval density (i.e., defined as more larvae per unit of space), and understanding how the  
421 competition for space underlies larval behaviour is out of the scope of this study. Also, patch  
422 quality could have decreased over time, especially in treatments with high larval densities,  
423 and influenced some of the results found in our study. This is unlikely, however, because the  
424 number of individuals in each patch sharply increased and stabilised in a plateau, with no  
425 evidence of larvae evasion from the chosen patches throughout the 24h in which the  
426 experiment was conducted (see e.g., Fig S3). Thus, our results demonstrate how the  
427 interactions between larval density and larval nutritional environment shape larval foraging  
428 behaviour.

429

## 430 **Conclusion**

431 The present study provides a new perspective on density-dependent effects on larval  
432 development. Fruit fly larvae respond to a range of social and nutritional factors, with  
433 important implications for larval foraging and growth. Together, our findings help us  
434 understand the ecological factors underpinning larval development in insects, and serve as an  
435 important stepping-stone for future research aimed at better understanding the behavioural  
436 and nutritional aspects of development in group-living insects.

437

## 438 **Acknowledgements**

439 Project *Larval diets for high-productivity mass-rearing* (HG13045) is funded by the Hort  
440 Frontiers Fruit Fly Fund, part of the Hort Frontiers strategic partnership initiative developed  
441 by Hort Innovation, with co-investment from Macquarie University and contributions from  
442 the Australian Government. We acknowledge Dr Alistair M Senior, University of Sydney, for  
443 helpful comments on the statistical analysis using multinomial logistic regression.

## 444 **Authors' Contribution**

445 J.M, P.W.T, and F.P designed the experiment. J.M, F.P., B.N and S.T.T collected the data.  
446 J.M, F.P, B.N and P.W.T analysed the data. All authors wrote the manuscript, approved the  
447 submission, and agree to be accountable for all aspects of the work.

## 448 **Conflict of interests**

449 The authors have no competing interests to declare.

## 450 **References**

- 451 1 Amitin, E. G. & Pitnick, S. Influence of developmental environment on male- and  
452 female-mediated sperm precedence in *Drosophila melanogaster*. *J Evolution Biol* **20**,  
453 381-391, doi:Doi 10.1111/J.1420-9101.2006.01184.X (2007).
- 454 2 Pitnick, S. & Garcia-Gonzalez, F. Harm to females increases with male body size in  
455 *Drosophila melanogaster*. *P Roy Soc B-Biol Sci* **269**, 1821-1828, doi:Doi  
456 10.1098/Rspb.2002.2090 (2002).
- 457 3 Lyimo, E., Takken, W. & Koella, J. Effect of rearing temperature and larval density  
458 on larval survival, age at pupation and adult size of *Anopheles gambiae*. *Entomologia*  
459 *experimentalis et applicata* **63**, 265-271 (1992).
- 460 4 Credland, P. F., Dick, K. M. & Wright, A. W. Relationships between larval density,  
461 adult size and egg production in the cowpea seed beetle, *Callosobruchus maculatus*.  
462 *Ecological Entomology* **11**, 41-50, doi:10.1111/j.1365-2311.1986.tb00278.x (1986).
- 463 5 Wigby, S., Perry, J. C., Kim, Y. H. & Sirot, L. K. Developmental environment  
464 mediates male seminal protein investment in *Drosophila melanogaster*. *Funct Ecol*  
465 **30**, 410-419 (2015).
- 466 6 Morimoto, J., Ponton, F., Tychsen, I., Cassar, J. & Wigby, S. Interactions between the  
467 developmental and adult social environments mediate group dynamics and offspring  
468 traits in *Drosophila melanogaster*. *Scientific Reports* **7**, 3574, doi:10.1038/s41598-  
469 017-03505-2 (2017).
- 470 7 Moczek, A. P. Horn polyphenism in the beetle *Onthophagus taurus*: larval diet  
471 quality and plasticity in parental investment determine adult body size and male horn  
472 morphology. *Behavioral Ecology* **9**, 636-641 (1998).

- 473 8 Nasci, R. S. & Mitchell, C. J. Larval diet, adult size, and susceptibility of *Aedes*  
474 *aegypti* (Diptera: Culicidae) to infection with Ross River virus. *Journal of Medical*  
475 *Entomology* **31**, 123-126 (1994).
- 476 9 Burrack, H. J. *et al.* Intraspecific larval competition in the olive fruit fly (Diptera:  
477 Tephritidae). *Environmental entomology* **38**, 1400-1410 (2009).
- 478 10 Averill, A. L. & Prokopy, R. J. Intraspecific competition in the tephritid fruit fly  
479 *Rhagoletis pomonella*. *Ecology* **68**, 878-886 (1987).
- 480 11 Bonduriansky, R. The evolution of male mate choice in insects: a synthesis of ideas  
481 and evidence. *Biol Rev* **76**, 305-339 (2001).
- 482 12 Honek, A. Intraspecific variation in body size and fecundity in Insects - a general  
483 relationship. *Oikos* **66**, 483-492, doi:Doi 10.2307/3544943 (1993).
- 484 13 Roff, D. A. *Life history evolution*. Vol. 7 (Sinauer Associates Sunderland, 2002).
- 485 14 Stearns, S. C. *The evolution of life histories*. Vol. 249 (Oxford University Press  
486 Oxford, 1992).
- 487 15 Clutton-Brock, T. Sexual selection in females. *Anim Behav* **77**, 3-11 (2009).
- 488 16 Sokolowski, M. B., Kent, C. & Wong, J. *Drosophila* larval foraging behaviour:  
489 developmental stages. *Anim Behav* **32**, 645-651 (1984).
- 490 17 Sokolowski, M. B., Pereira, H. S. & Hughes, K. Evolution of foraging behavior in  
491 *Drosophila* by density-dependent selection. *Proceedings of the National Academy of*  
492 *Sciences* **94**, 7373-7377 (1997).
- 493 18 Kohn, N. R. *et al.* Social environment influences performance in a cognitive task in  
494 natural variants of the foraging gene. *PloS one* **8**, e81272 (2013).
- 495 19 Bell, W. J. *Searching behaviour: the behavioural ecology of finding resources*.  
496 (Springer Science & Business Media, 2012).
- 497 20 Rowe, L. & Houle, D. The lek paradox and the capture of genetic variance by  
498 condition dependent traits. *P Roy Soc B-Biol Sci* **263**, 1415-1421, doi:Doi  
499 10.1098/Rspb.1996.0207 (1996).
- 500 21 Hill, G. E. Condition-dependent traits as signals of the functionality of vital cellular  
501 processes. *Ecol Lett* **14**, 625-634, doi:Doi 10.1111/J.1461-0248.2011.01622.X (2011).
- 502 22 Simpson, S. J. & Raubenheimer, D. *The nature of nutrition: a unifying framework*  
503 *from animal adaptation to human obesity*. (Princeton University Press, 2012).
- 504 23 Rodrigues, M. A. *et al.* *Drosophila melanogaster* larvae make nutritional choices that  
505 minimize developmental time. *Journal of insect physiology* **81**, 69-80 (2015).
- 506 24 Zucoloto, F. S. Feeding habits of *Ceratitis capitata* (Diptera: Tephritidae): can larvae  
507 recognize a nutritionally effective diet? *Journal of Insect Physiology* **33**, 349-353  
508 (1987).
- 509 25 Zucoloto, F. Effects of flavour and nutritional value on diet selection by *Ceratitis*  
510 *capitata* larvae (Diptera, Tephritidae). *Journal of Insect Physiology* **37**, 21-25 (1991).
- 511 26 Silva-Soares, N. F., Nogueira-Alves, A., Beldade, P. & Mirth, C. K. Adaptation to  
512 new nutritional environments: larval performance, foraging decisions, and adult  
513 oviposition choices in *Drosophila suzukii*. *BMC ecology* **17**, 21 (2017).
- 514 27 de Carvalho, M. J. A. & Mirth, C. K. Food intake and food choice are altered by the  
515 developmental transition at critical weight in *Drosophila melanogaster*. *Anim Behav*  
516 **126**, 195-208 (2017).
- 517 28 Fanson, B. G. & Taylor, P. W. Protein: carbohydrate ratios explain life span patterns  
518 found in Queensland fruit fly on diets varying in yeast: sugar ratios. *Age* **34**, 1361-  
519 1368 (2012).
- 520 29 Um, S. H., D'Alessio, D. & Thomas, G. Nutrient overload, insulin resistance, and  
521 ribosomal protein S6 kinase 1, S6K1. *Cell Metab* **3**, 393-402, doi:Doi  
522 10.1016/J.Cmet.2006.05.003 (2006).

- 523 30 Musselman, L. P. *et al.* A high-sugar diet produces obesity and insulin resistance in  
524 wild-type *Drosophila*. *Disease models & mechanisms* **4**, 842-849,  
525 doi:10.1242/dmm.007948 (2011).
- 526 31 Schwarz, S., Durisko, Z. & Dukas, R. Food selection in larval fruit flies: dynamics  
527 and effects on larval development. *Naturwissenschaften* **101**, 61-68 (2014).
- 528 32 Taylor, L. Aggregation, variance and the mean. *Nature* **189**, 732-735 (1961).
- 529 33 Taylor, L., Woiwod, I. & Perry, J. The density-dependence of spatial behaviour and  
530 the rarity of randomness. *The Journal of Animal Ecology*, 383-406 (1978).
- 531 34 Cornell, J. C., Stamp, N. E. & Bowers, M. D. Developmental change in aggregation,  
532 defense and escape behavior of buckmoth caterpillars, *Hemileuca lucina*  
533 (Saturniidae). *Behavioral Ecology and Sociobiology* **20**, 383-388 (1987).
- 534 35 Klok, C. & Chown, S. Assessing the benefits of aggregation: thermal biology and  
535 water relations of anomalous Emperor Moth caterpillars. *Functional ecology* **13**, 417-  
536 427 (1999).
- 537 36 Slone, D. & Gruner, S. V. Thermoregulation in larval aggregations of carrion-feeding  
538 blow flies (Diptera: Calliphoridae). *Journal of Medical Entomology* **44**, 516-523  
539 (2007).
- 540 37 Stamp, N. E. & Bowers, M. D. Variation in food quality and temperature constrain  
541 foraging of gregarious caterpillars. *Ecology* **71**, 1031-1039 (1990).
- 542 38 Wise, M. J., Kieffer, D. L. & Abrahamson, W. G. Costs and benefits of gregarious  
543 feeding in the meadow spittlebug, *Philaenus spumarius*. *Ecological Entomology* **31**,  
544 548-555 (2006).
- 545 39 Hambäck, P. Density-dependent processes in leaf beetles feeding on purple  
546 loosestrife: aggregative behaviour affecting individual growth rates. *Bulletin of*  
547 *entomological research* **100**, 605-611 (2010).
- 548 40 Denno, R. & Benrey, B. Aggregation facilitates larval growth in the neotropical  
549 nymphalid butterfly *Chlosyne janais*. *Ecological Entomology* **22**, 133-141 (1997).
- 550 41 Storer, A., Wainhouse, D. & Speight, M. The effect of larval aggregation behaviour  
551 on larval growth of the spruce bark beetle *Dendroctonus micans*. *Ecological*  
552 *Entomology* **22**, 109-115 (1997).
- 553 42 Brian, R. The consequences of larval aggregation in the butterfly *Chlosyne lacinia*.  
554 *Ecological Entomology* **22**, 408-415 (1997).
- 555 43 Hochuli, D. F. Insect herbivory and ontogeny: How do growth and development  
556 influence feeding behaviour, morphology and host use? *Austral Ecology* **26**, 563-570  
557 (2001).
- 558 44 Hunter, A. F. Gregariousness and repellent defences in the survival of phytophagous  
559 insects. *Oikos* **91**, 213-224 (2000).
- 560 45 Durisko, Z. & Dukas, R. Attraction to and learning from social cues in fruitfly larvae.  
561 *Proceedings of the Royal Society of London B: Biological Sciences* **280**, 20131398  
562 (2013).
- 563 46 Golden, S. & Dukas, R. The value of patch-choice copying in fruit flies. *PloS one* **9**,  
564 e112381 (2014).
- 565 47 Venu, I., Durisko, Z., Xu, J. & Dukas, R. Social attraction mediated by fruit flies'  
566 microbiome. *Journal of Experimental Biology* **217**, 1346-1352 (2014).
- 567 48 Ward, A. & Webster, M. *Sociality: the behaviour of group-living animals*. (Springer,  
568 2016).
- 569 49 Clarke, A. R., Powell, K. S., Weldon, C. W. & Taylor, P. W. The ecology of  
570 *Bactrocera tryoni* (Diptera: Tephritidae): what do we know to assist pest  
571 management? *Annals of Applied Biology* **158**, 26-54 (2011).

- 572 50 Virgilio, M., Delatte, H., Backeljau, T. & De Meyer, M. Macrogeographic population  
573 structuring in the cosmopolitan agricultural pest *Bactrocera cucurbitae* (Diptera:  
574 Tephritidae). *Molecular Ecology* **19**, 2713-2724 (2010).
- 575 51 Malacrida, A. *et al.* Globalization and fruitfly invasion and expansion: the medfly  
576 paradigm. *Genetica* **131**, 1 (2007).
- 577 52 Schutze, M. K., Virgilio, M., Norrbom, A. & Clarke, A. R. Tephritid integrative  
578 taxonomy: Where we are now, with a focus on the resolution of three tropical fruit fly  
579 species complexes. *Annual review of entomology* **62**, 147-164 (2017).
- 580 53 Moadeli, T., Taylor, P. W. & Ponton, F. High productivity gel diets for rearing of  
581 Queensland fruit fly, *Bactrocera tryoni*. *Journal of Pest Science* **2**, 507-520 (2017).
- 582 54 R Development Core Team. R: A language and environment for statistical computing.  
583 *R. Foundation for Statistical Computing, Vienna, Austria.* <http://www.r-project.org/>  
584 (2017).
- 585 55 Wickham, H. ggplot2: elegant graphics for data analysis. (2009).
- 586 56 Liaw, A. & Wiener, M. Classification and regression by randomForest. *R news* **2**, 18-  
587 22 (2002).
- 588 57 Murphy, M. A., Evans, J. S. & Storfer, A. Quantifying *Bufo boreas* connectivity in  
589 Yellowstone National Park with landscape genetics. *Ecology* **91**, 252-261 (2010).
- 590 58 Ripley, B. D. *Modern applied statistics with S.* (Springer, 2002).
- 591 59 Prokopy, R. J. & Roitberg, B. D. Joining and avoidance behavior in nonsocial insects.  
592 *Annual review of entomology* **46**, 631-665 (2001).
- 593 60 Ekesi, S., Billah, M. K., Nderitu, P. W., Lux, S. A. & Rwomushana, I. Evidence for  
594 competitive displacement of *Ceratitidis cosyra* by the invasive fruit fly *Bactrocera*  
595 *invadens* (Diptera: Tephritidae) on mango and mechanisms contributing to the  
596 displacement. *Journal of Economic Entomology* **102**, 981-991 (2009).
- 597 61 Peiris, K., Dull, G., Leffler, R. & Kays, S. Near-infrared spectrometric method for  
598 nondestructive determination of soluble solids content of peaches. *Journal of the*  
599 *American Society for Horticultural Science* **123**, 898-905 (1998).
- 600 62 Matavelli, C., Carvalho, M. J. A., Martins, N. E. & Mirth, C. K. Differences in larval  
601 nutritional requirements and female oviposition preference reflect the order of fruit  
602 colonization of *Zaprionus indianus* and *Drosophila simulans*. *Journal of insect*  
603 *physiology* **82**, 66-74 (2015).
- 604 63 Drew, R. Amino acid increases in fruit infested by fruit flies of the family  
605 Tephritidae. *Zoological Journal of the Linnean Society* **93**, 107-112 (1988).
- 606 64 MacCollom, G., Lauzon, C., Sjogren, R., Meyer, W. & Olday, F. Association and  
607 attraction of blueberry maggot fly Curran (Diptera: Tephritidae) to *Pantoea*  
608 (Enterobacter) *agglomerans*. *Environmental Entomology* **38**, 116-120 (2009).
- 609 65 Aluja, M., Sivinski, J., Rull, J. & Hodgson, P. J. Behavior and predation of fruit fly  
610 larvae (*Anastrepha spp.*)(Diptera: Tephritidae) after exiting fruit in four types of  
611 habitats in tropical Veracruz, Mexico. *Environmental Entomology* **34**, 1507-1516  
612 (2005).
- 613 66 Uchôa, M. in *Integrated Pest Management and Pest Control-Current and Future*  
614 *Tactics* (InTech, 2012).
- 615 67 Fitt, G. P. Oviposition behaviour of two tephritid fruit flies, *Dacus tryoni* and *Dacus*  
616 *jarvisi*, as influenced by the presence of larvae in the host fruit. *Oecologia* **62**, 37-46  
617 (1984).
- 618 68 Svanbäck, R. & Bolnick, D. I. Intraspecific competition drives increased resource use  
619 diversity within a natural population. *Proceedings of the Royal Society of London B:*  
620 *Biological Sciences* **274**, 839-844 (2007).

- 621 69 Svanbäck, R. & Bolnick, D. I. Intraspecific competition affects the strength of  
622 individual specialization: an optimal diet theory method. *Evolutionary Ecology*  
623 *Research* **7**, 993-1012 (2005).
- 624 70 Bolnick, D. I. *et al.* The ecology of individuals: incidence and implications of  
625 individual specialization. *The American Naturalist* **161**, 1-28 (2002).
- 626 71 Dall, S. R., Giraldeau, L.-A., Olsson, O., McNamara, J. M. & Stephens, D. W.  
627 Information and its use by animals in evolutionary ecology. *Trends Ecol Evol* **20**,  
628 187-193 (2005).
- 629 72 Lihoreau, M. *et al.* Collective foraging in spatially complex nutritional environments.  
630 *Philosophical Transactions of the Royal Society B: Biological Sciences* **372**,  
631 20160238 (2017).
- 632 73 Vijendravarma, R. K., Narasimha, S. & Kawecki, T. J. Predatory cannibalism in  
633 *Drosophila melanogaster* larvae. *Nature communications* **4**, 1789 (2013).
- 634 74 Schultner, E., d'Ettorre, P. & Helanterä, H. Social conflict in ant larvae: egg  
635 cannibalism occurs mainly in males and larvae prefer alien eggs. *Behavioral Ecology*  
636 **24**, 1306-1311 (2013).
- 637 75 Wong, A. C.-N. *et al.* Gut microbiota modifies olfactory-guided microbial preferences  
638 and foraging decisions in *Drosophila*. *Current Biology* **27**, 2397-2404. e2394 (2017).
- 639 76 Piper, A. M., Farnier, K., Linder, T., Speight, R. & Cunningham, J. P. Two gut-  
640 associated yeasts in a Tephritid fruit fly have contrasting effects on adult attraction  
641 and larval survival. *Journal of Chemical Ecology* **43**, 891-901 (2017).
- 642 77 Bruno, J. F., Stachowicz, J. J. & Bertness, M. D. Inclusion of facilitation into  
643 ecological theory. *Trends in Ecology & Evolution* **18**, 119-125 (2003).
- 644

645 **Figure Legends**

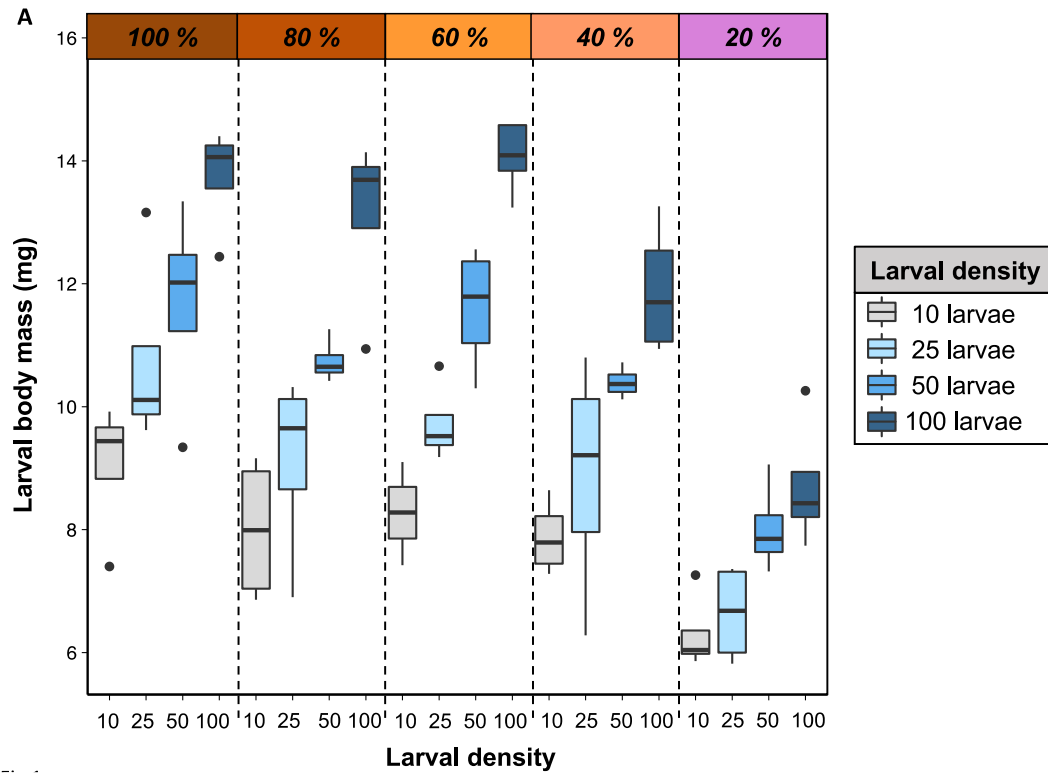

646

647 **Figure 1 – Larval density increases larval body mass across diet dilutions.** Body mass

648 (mg) of larvae from different larval densities and from across diets, at the end of our

649 experiment (24h, see Methods for details).



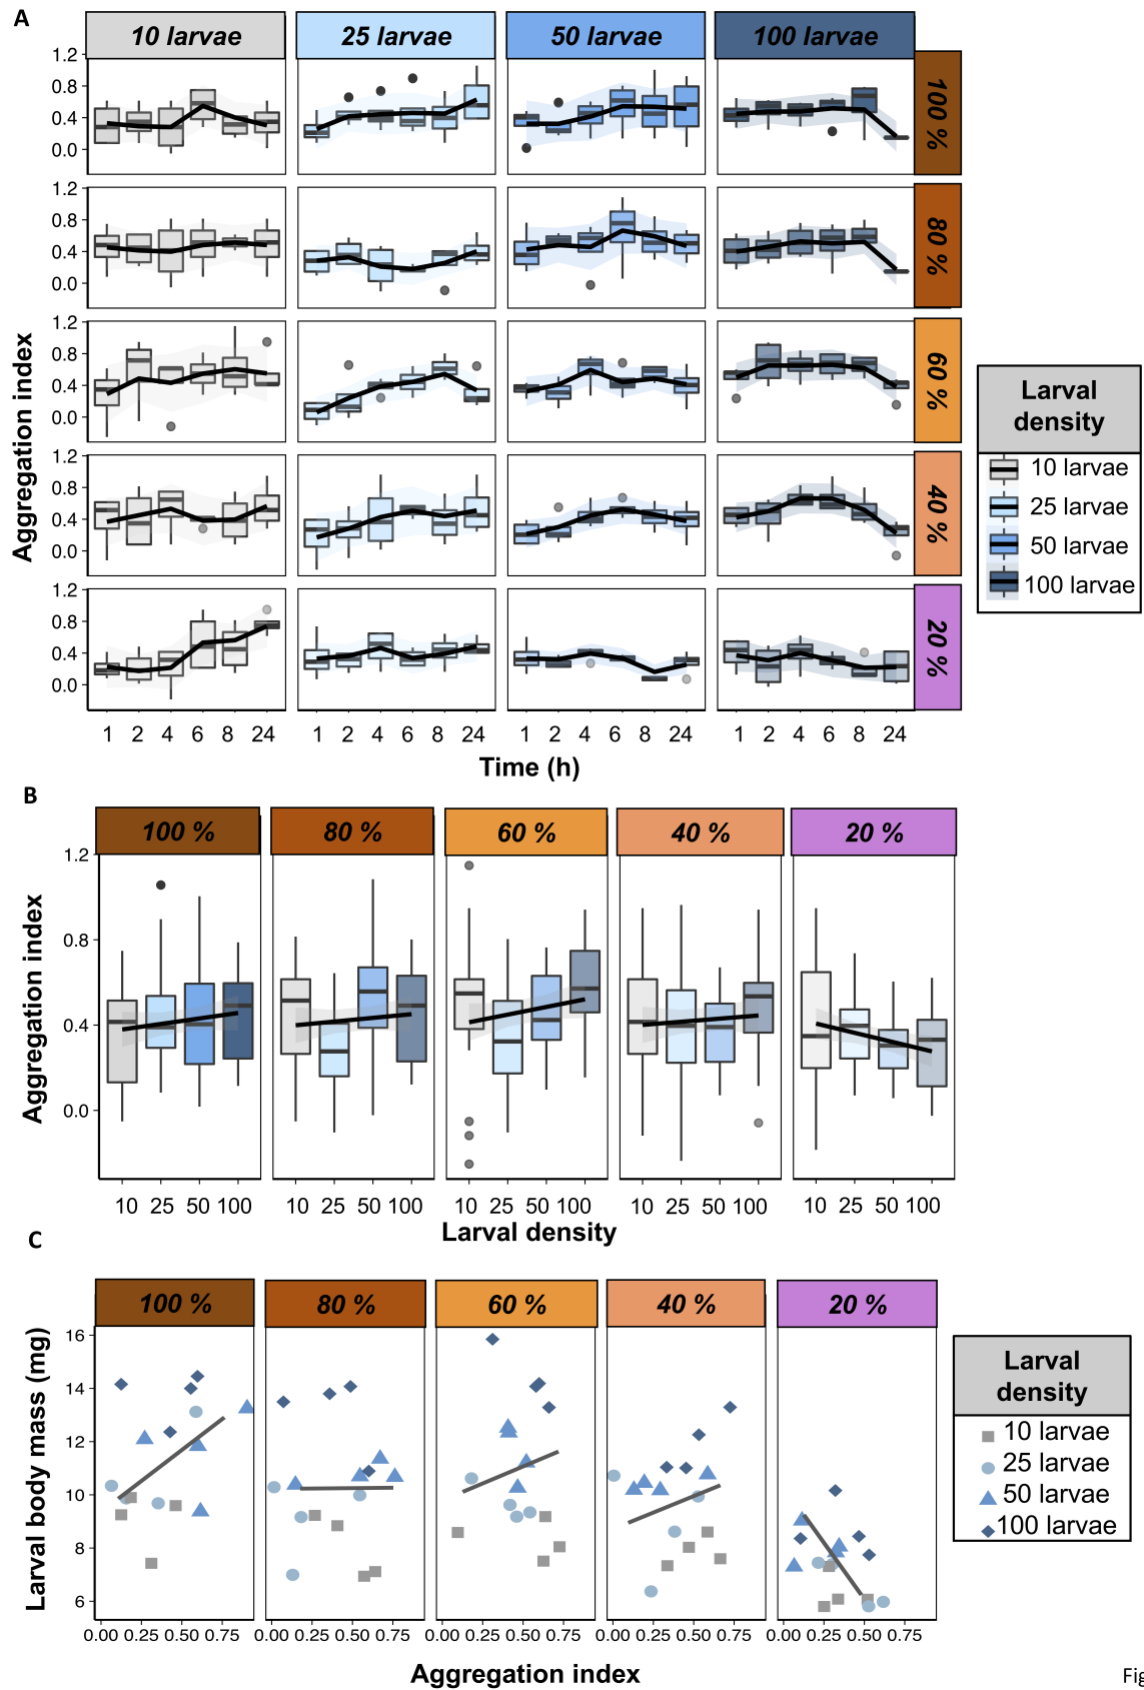

650

Fig 2

651 **Figure 2 – Body mass and the relationship between body mass and aggregation.**

652 (a) Larval aggregation index (y-axis) over time (x-axis) across larval densities (horizontally)  
653 and across diets (vertically). Lines were drawn using the 'loess' method in the package  
654 'ggplot2' in R, and indicate the trend in the data. (b) Average larval aggregation index (y-  
655 axis) on larval density (x-axis) over all time points in our experiment. Lines were drawn  
656 using the 'lm' method in the package 'ggplot2' in R, and indicate the trend in the data. (c)  
657 The relationship between larval body mass and the average aggregation index. Colours and  
658 shapes indicate the larval density. Lines were drawn using the 'loess' method in the package  
659 'ggplot2' in R, and indicate the trend in the data.

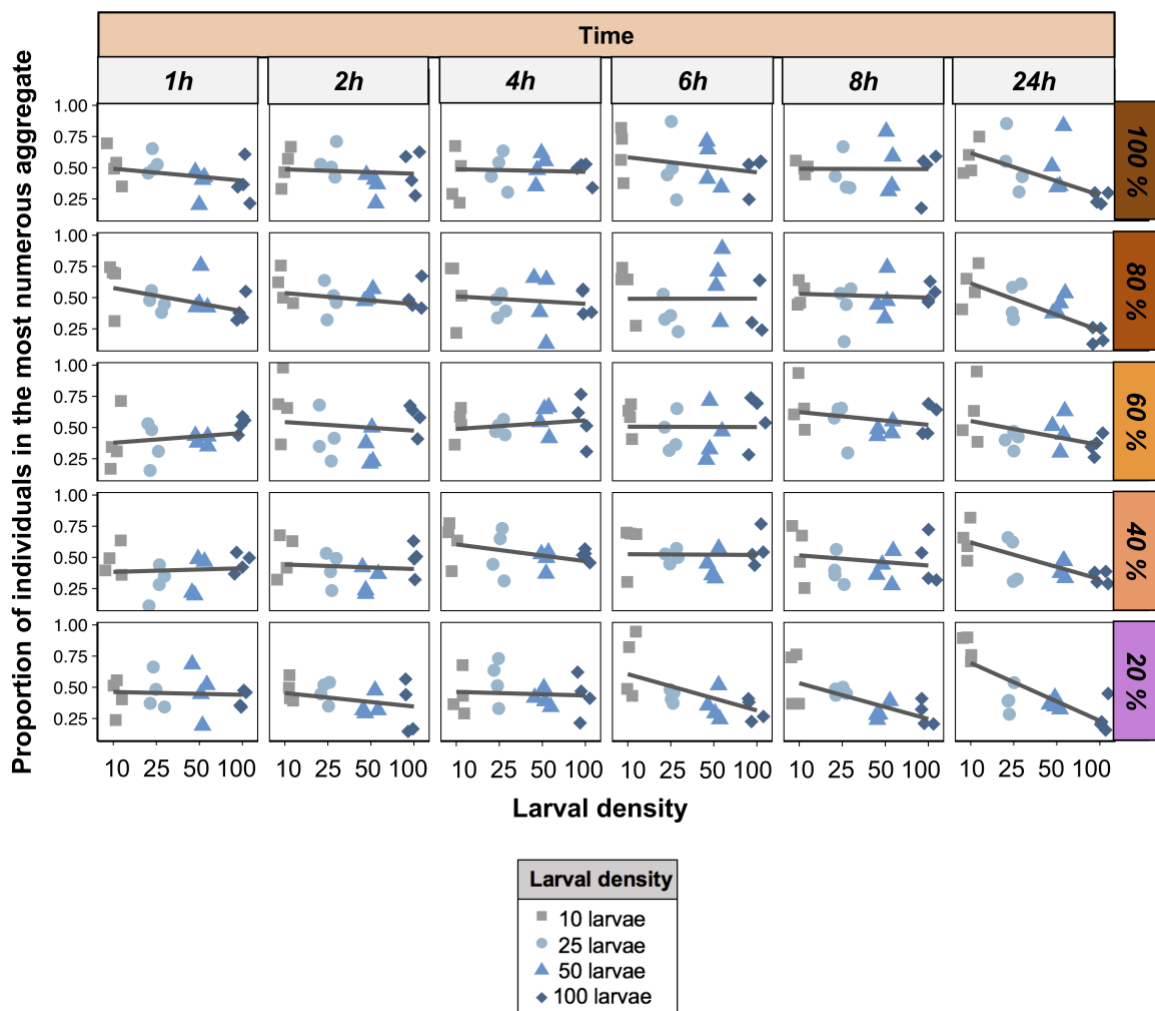

660

661 **Figure 3 – Proportion of larvae in aggregates.** The proportion of individuals in the most  
662 numerous aggregate over time (horizontally) across diets (vertically). Shapes and colours

663 indicate larval density. Lines were drawn using the ‘lm’ method in the package ‘ggplot2’ in  
664 R, and indicate the trend in the data.

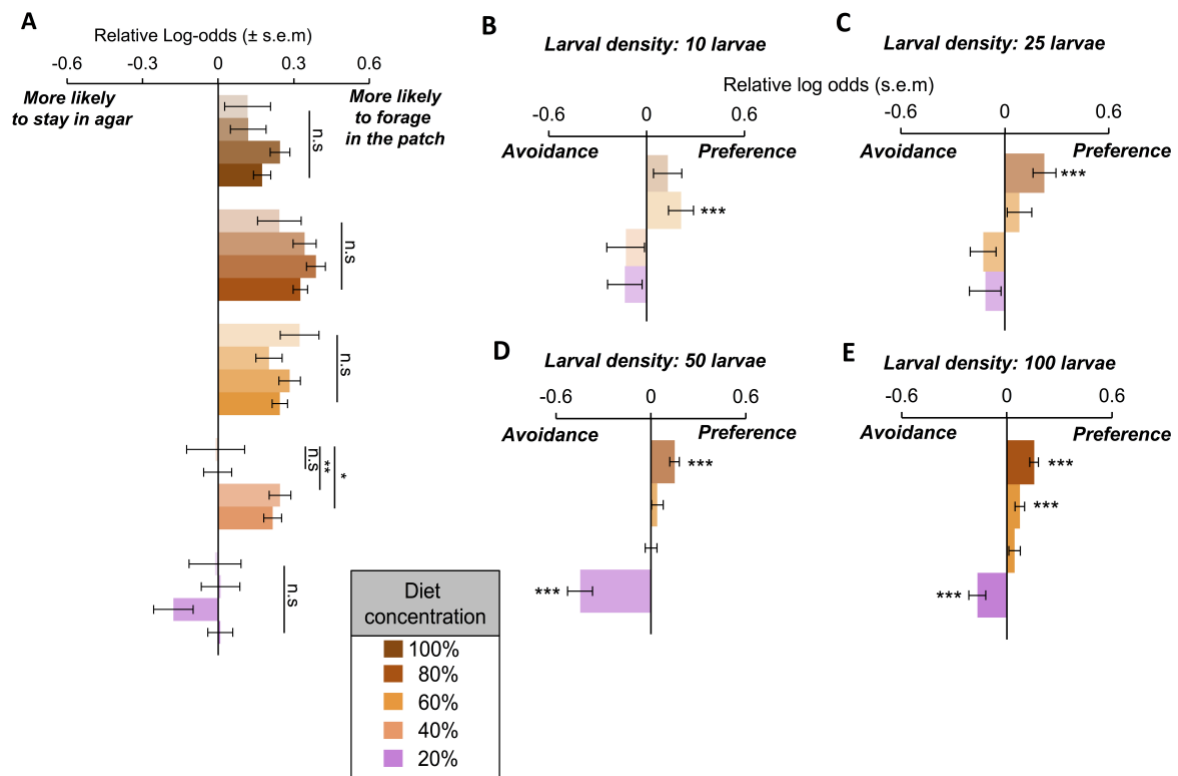

665

666 **Figure 4 – Larval foraging propensity.** (a) Relative log-odds of larvae making a choice to

667 forage in a given food patch relative to staying in agar (no choice). Shades represent different

668 larval densities: 10, 25, 50, and 100 larvae. p-values obtained using Students’ *t*-distribution.

669 Note that relative log-odds are calculated using the control 100% diet as reference. Log-odds

670 > 0: more likely to choose a given patch relative to staying in agar, Log-odds < 0, less likely

671 to choose a given patch relative to staying in agar. s.e.m = standard error of the mean. (b-e)

672 Relative log-odds of larvae patch preferences. Patch with standard diet (100% macronutrient

673 concentration) was used as the reference level. \*\*\* non-overlapping 99% confidence

674 intervals. s.e.m = standard error of the mean.

675

676 **Supplementary Information**

677 **Supplementary Information file** – Supplementary figures and tables with the complete  
678 outputs of the statistical models.

679 **Figure S1 - Design of the foraging arenas.** (a) Schematic representations of the foraging  
680 arena used in our larval dietary choice experiments. (b) Schematic representations of the  
681 foraging arena used in our larval aggregation experiments. Note that the arenas were  
682 designed exactly as in (a), although all patches contained the same diet concentration.

683 **Figure S2 – Box plots showing the behaviour of the residuals from the density-**  
684 **dependent simulation.** Note that we extrapolated our simulations to include foraging groups  
685 with density of 200 larvae (see Methods). Line was drawn using the ‘loess’ method in the  
686 package ‘ggplot2’ in R to highlight the trend in the data.

687 **Figure S3 – Larval foraging behaviour.** The number of larvae in each foraging patch over  
688 time across the larval density treatments.

689 **Table S1 – Complete analysis of larvae body mass. Bold:  $p < 0.05$**

690 **Table S2 – Complete analysis of larvae aggregation index.** Data was transformed (square-  
691 rooted) for statistical testing. **Bold:  $p < 0.05$**

692 **Table S3 – Complete analysis of the relationship between larvae body mass and**  
693 **aggregation index. Bold:  $p < 0.05$**

694 **Table S4 – Complete analysis of the proportion of larvae in the most numerous**  
695 **aggregate.** GLM with Binomial distribution and quasi extension to account for  
696 overdispersion of the data.

697 **Table S5 - Complete analysis of larvae willingness to forage.** Agar (no choice) is the  
698 reference level. **Bold:  $p < 0.05$**

699 **Table S6 - Complete analysis of larvae dietary choices.** Standard diet (100% macronutrient  
700 concentration) as reference level. \*\*\* non-overlapping 99% CI.

701 **Diet recipes** – The formulations for the diets used in the experiments.
